# Supplementary material for: Order-of-magnitude enhancement of an enzymatic hydrogen-air fuel cell based on pyrenyl carbon nanostructures
Source: Royal Society of Chemistry journal article supplement (doi:10.1039/c2sc01103d), 2012-01-01
Supplement: c2sc01103d.pdf [file c2sc01103d.pdf]

## Supplementary information for:

# Order-of-Magnitude Enhancement of an Enzymatic Hydrogen-Air Fuel Cell based on Pyrenyl Carbon Nanostructures

Sadagopan Krishnan and Fraser A. Armstrong\*

Inorganic Chemistry Laboratory, Department of Chemistry,  
University of Oxford, South Parks Road, Oxford, UK, OX1 3QR.

\* To whom correspondence should be addressed. E-mail: [fraser.armstrong@chem.ox.ac.uk](mailto:fraser.armstrong@chem.ox.ac.uk)

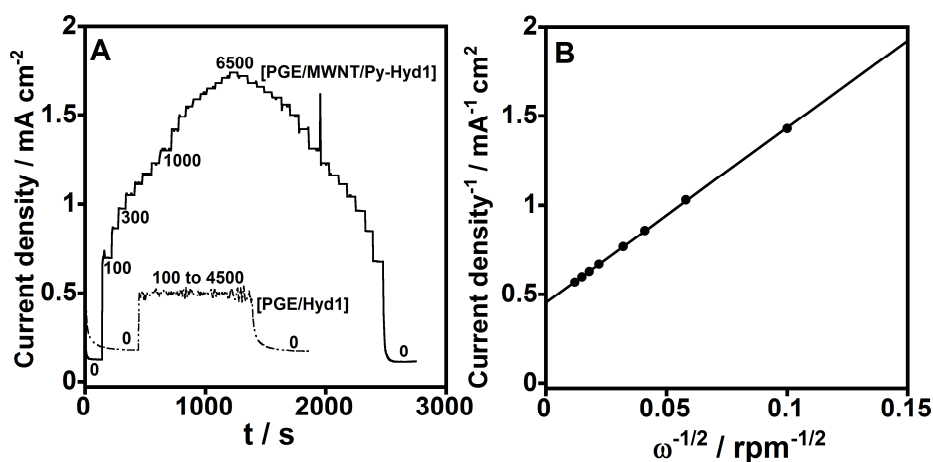

**Figure S1 (A)** Rotation rate dependence (in rpm) of the electrocatalytic current density for H<sub>2</sub> oxidation at a [PGE/MWNT/Py-Hyd1] electrode or Hyd1 simply adsorbed on polished PGE ([PGE/Hyd1]). Experimental conditions: 100 % H<sub>2</sub>, 25 °C, pH 6.0, potential -40 mV vs SHE. **(B)** Koutecky-Levich plot analyzing the H<sub>2</sub> oxidation current density by the [PGE/MWNT/Py-Hyd1] electrode, measured at -40 mV vs SHE.

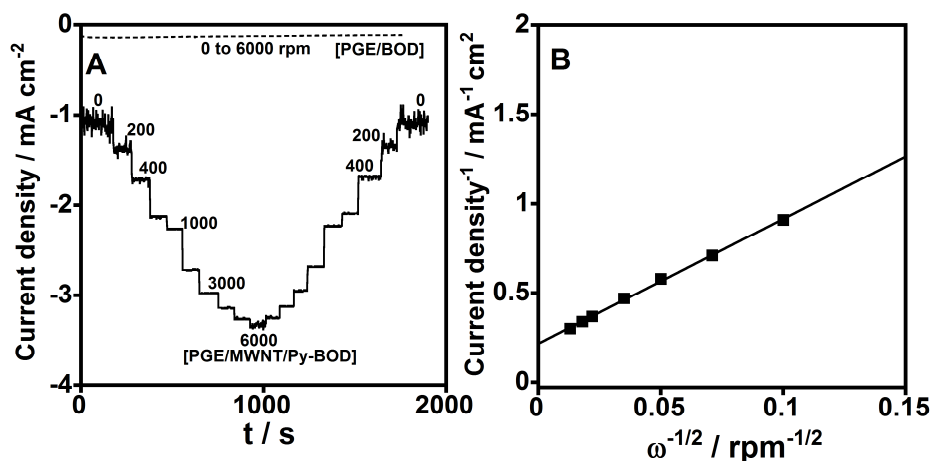

**Figure S2** (A) Rotation rate dependence (in rpm) of the electrocatalytic current density for O<sub>2</sub> reduction at a [PGE/MWNT/Py-BOD] electrode or BOD simply adsorbed on polished PGE ([PGE/BOD]). Experimental conditions: saturated O<sub>2</sub>, 25 °C, pH 5.0, potential +340 mV vs SHE. (B) Koutecky-Levich plot analyzing the O<sub>2</sub> reduction current density by the [PGE/MWNT/Py-BOD] electrode, measured at +340 mV vs SHE.

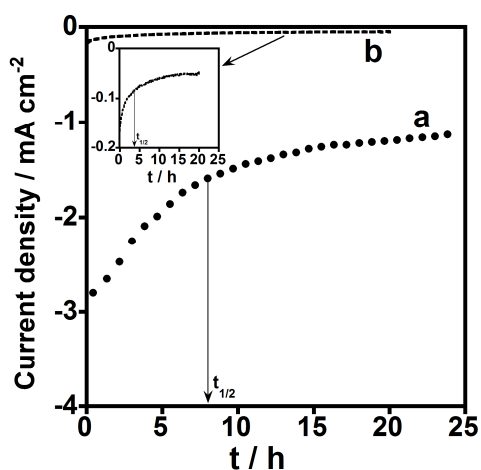

**Figure S3** Stability measurements in saturated O<sub>2</sub> for (a) a [PGE/MWNT/Py-BOD] electrode and (b) BOD adsorbed on polished PGE ([PGE/BOD]). Chronoamperometry was carried out at +340 mV vs SHE, 25 °C, pH 5.0, 2500 rpm. (Inset) Enlarged chronoamperometry trace of (b).

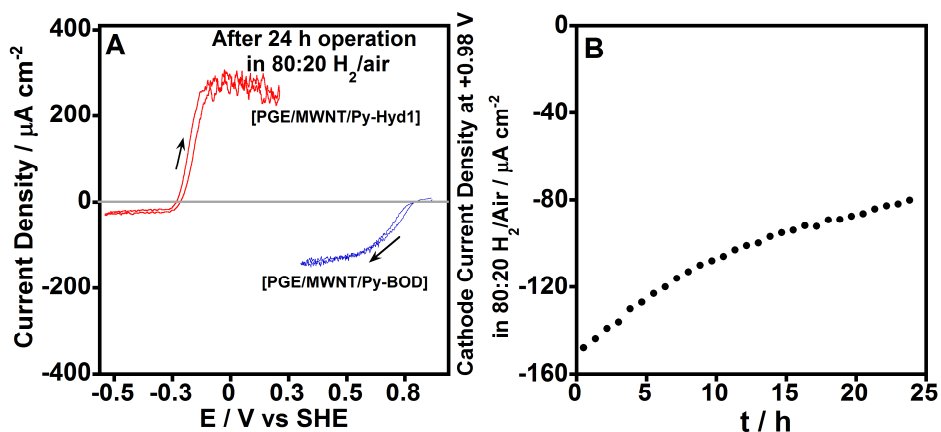

**Figure S4** (A) Voltammograms of a [PGE/MWNT/Py-Hyd1] anode and a [PGE/MWNT/Py-BOD] cathode after 24 h operation in the membraneless quiescent fuel cell, operated at an applied potential of 0.98 V in an 80:20 H<sub>2</sub>/air fuel mixture, pH 5.0, 25°C; (B) Current density vs time for the [PGE/MWNT/Py-BOD] cathode in the fuel cell at an applied constant potential of 0.98 V in an 80:20 H<sub>2</sub>/air fuel mixture, pH 5.0, 25°C.

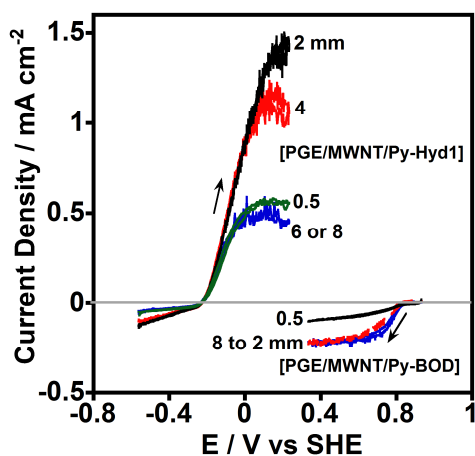

**Figure S5** Voltammograms of a [PGE/MWNT/Py-Hyd1] anode and a [PGE/MWNT/Py-BOD] cathode at various separation distances (as denoted in the graph in mm) in the quiescent membraneless fuel cell through which an 80:20 H<sub>2</sub>/air fuel mixture was bubbled. Other conditions: 25 °C, pH 5.0.
